# Supplementary material
Source: Frontiers journal article supplement (https://www.frontiersin.org/articles/432711)
Supplement: Data_Sheet_3.XLS [file Data_Sheet_3.XLS]

## Sheet: DAP_pld1_2_vs_col_0_results
Protein Group	Sequence Id	Sequence Name	pld1_2 N-Int Log2 Relative Expression	pld1_2/col_0 Ratio	P Value	Protein Weight (kDa)	Protein Isoelectric Point (pI)	Total Protein Probability	Total Score	Total Peptides	Total Peptides (Paris Guidelines)	Total % Seq Coverage	Total Spectral Count	1
40	Q9SCW1	BGAL1_ARATH Beta-galactosidase 1 OS=Arabidopsis thaliana GN=BGAL1 PE=2 SV=1	10	pld1_2 unique	-1	93.5802	0.00851416	0.999999	13.9004	4	4	8.73672	4	1584
44	Q9FIE8	UXS3_ARATH UDP-glucuronic acid decarboxylase 3 OS=Arabidopsis thaliana GN=UXS3 PE=1 SV=1	10	pld1_2 unique	-1	38.5269	0.00820654	0.999996	11.9738	3	3	17.5439	3	1614
50	Q07356	PDS_ARATH 15-cis-phytoene desaturase, chloroplastic/chromoplastic OS=Arabidopsis thaliana GN=PDS PE=1 SV=1	10	pld1_2 unique	-1	62.9054	0.00606201	0.999997	10.779	3	3	8.30389	3	1659
53	Q9SUT5	SGT1B_ARATH Protein SGT1 homolog B OS=Arabidopsis thaliana GN=SGT1B PE=1 SV=1	10	pld1_2 unique	-1	39.7192	0.00488135	0.999609	10.5782	3	3	12.2905	4	1680
57	P56797	RR2_ARATH 30S ribosomal protein S2, chloroplastic OS=Arabidopsis thaliana GN=rps2 PE=3 SV=1	10	pld1_2 unique	-1	26.8691	0.0100376	0.999977	10.3201	3	3	21.6102	4	1706
59	Q8VZJ2	BGNEM_ARATH Probable glucan endo-1,3-beta-glucosidase At4g16260 OS=Arabidopsis thaliana GN=At4g16260 PE=1 SV=1	10	pld1_2 unique	-1	37.6701	0.00687354	0.999948	10.1955	3	3	17.7326	4	1725
63	P29976	AROF_ARATH Phospho-2-dehydro-3-deoxyheptonate aldolase 1, chloroplastic OS=Arabidopsis thaliana GN=DHS1 PE=2 SV=2	10	pld1_2 unique	-1	57.9244	0.00798682	0.999126	9.88658	3	3	9.33333	3	1745
65	Q9FHW7	SKP1B_ARATH SKP1-like protein 1B OS=Arabidopsis thaliana GN=SKP1B PE=1 SV=1	10	pld1_2 unique	-1	19.0674	0.00434814	0.999727	8.66979	2	2	19.883	3	1757
67	Q96318	CRU3_ARATH 12S seed storage protein CRC OS=Arabidopsis thaliana GN=CRC PE=1 SV=1	10	pld1_2 unique	-1	58.1813	0.00656592	0.999986	8.58097	2	2	7.82443	2	1764
69	Q9FIJ7	KAD2_ARATH Adenylate kinase 2, chloroplastic OS=Arabidopsis thaliana GN=At5g47840 PE=1 SV=1	10	pld1_2 unique	-1	31.4143	0.00745947	0.999907	8.51234	2	2	14.4876	4	1771
71	Q93Y40	ORP3C_ARATH Oxysterol-binding protein-related protein 3C OS=Arabidopsis thaliana GN=ORP3C PE=2 SV=1	10	pld1_2 unique	-1	51.9152	0.00504639	0.999711	8.2345	2	2	6.78337	3	1786
80	P51420	RL313_ARATH 60S ribosomal protein L31-3 OS=Arabidopsis thaliana GN=RPL31C PE=3 SV=2	10	pld1_2 unique	-1	13.7765	0.0104331	0.999922	7.80917	2	2	25.2101	2	1840
81	P55217	CGS1_ARATH Cystathionine gamma-synthase 1, chloroplastic OS=Arabidopsis thaliana GN=CGS1 PE=1 SV=3	10	pld1_2 unique	-1	59.8627	0.00641748	0.999844	7.76907	2	2	6.92718	2	1843
85	Q93WL3	CLPT1_ARATH ATP-dependent Clp protease ATP-binding subunit CLPT1, chloroplastic OS=Arabidopsis thaliana GN=CLPT1 PE=1 SV=1	10	pld1_2 unique	-1	26.0156	0.00964209	0.99986	7.60527	2	2	18.0672	3	1866
88	Q9SVN5	SYMC_ARATH Methionine--tRNA ligase, cytoplasmic OS=Arabidopsis thaliana GN=At4g13780 PE=2 SV=1	10	pld1_2 unique	-1	89.7784	0.00662451	0.999912	7.48742	2	2	4.14053	3	1882
96	Q9ZW13	TRNH6_ARATH Tropinone reductase homolog At2g29290 OS=Arabidopsis thaliana GN=At2g29290 PE=2 SV=1	10	pld1_2 unique	-1	28.3694	0.00519873	0.994636	7.21319	2	2	10.687	3	1928
99	Q680K2	GPPL1_ARATH Haloacid dehalogenase-like hydrolase domain-containing protein At4g39970 OS=Arabidopsis thaliana GN=At4g39970 PE=2 SV=1	10	pld1_2 unique	-1	34.6155	0.0052749	0.993817	7.17207	2	2	9.17722	4	1942
103	Q93W28	Y4554_ARATH Uncharacterized protein At4g15545 OS=Arabidopsis thaliana GN=At4g15545 PE=1 SV=1	10	pld1_2 unique	-1	37.1657	0.00476709	0.999181	7.01432	2	2	7.12166	2	1968
104	F4IFC5	SYTM2_ARATH Threonine--tRNA ligase, chloroplastic/mitochondrial 2 OS=Arabidopsis thaliana GN=EMB2761 PE=2 SV=1	10	pld1_2 unique	-1	74.7193	0.00648096	0.999237	7.00831	2	2	5.07692	2	1971
106	Q84MC2	LOG8_ARATH Cytokinin riboside 5'-monophosphate phosphoribohydrolase LOG8 OS=Arabidopsis thaliana GN=LOG8 PE=1 SV=1	10	pld1_2 unique	-1	23.798	0.00531299	0.99972	6.96695	2	2	22.6852	2	1978
107	F4IXE4	TTL2_ARATH TPR repeat-containing thioredoxin TTL2 OS=Arabidopsis thaliana GN=TTL2 PE=2 SV=2	10	pld1_2 unique	-1	79.6857	0.00871924	0.993878	6.91748	2	2	6.43836	2	1981
108	Q9SYX1	LIL31_ARATH Light-harvesting complex-like protein 3 isotype 1, chloroplastic OS=Arabidopsis thaliana GN=LIL3.1 PE=1 SV=1	10	pld1_2 unique	-1	29.3669	0.00479248	0.999749	6.89792	2	2	14.8855	3	1984
109	P57752	ACBP6_ARATH Acyl-CoA-binding domain-containing protein 6 OS=Arabidopsis thaliana GN=ACBP6 PE=1 SV=1	10	pld1_2 unique	-1	10.3612	0.00504639	0.999645	6.81531	2	2	35.8696	2	1988
111	Q9FMH8	RD21B_ARATH Probable cysteine protease RD21B OS=Arabidopsis thaliana GN=RD21B PE=1 SV=1	10	pld1_2 unique	-1	51.1526	0.00580811	0.999778	6.75802	2	2	6.04752	2	1995
113	Q84M92	ARP4_ARATH Actin-related protein 4 OS=Arabidopsis thaliana GN=ARP4 PE=1 SV=1	10	pld1_2 unique	-1	48.8873	0.00507178	0.94355	6.71915	2	2	8.84354	2	2002
115	P47924	RIBA1_ARATH Bifunctional riboflavin biosynthesis protein RIBA 1, chloroplastic OS=Arabidopsis thaliana GN=RIBA1 PE=1 SV=2	10	pld1_2 unique	-1	59.0013	0.00550342	0.994585	6.60427	2	2	6.44567	2	2010
117	Q9ZWC6	ATB_ARATH F-box protein At-B OS=Arabidopsis thaliana GN=ATB PE=2 SV=1	10	pld1_2 unique	-1	66.1992	0.00682959	0.982686	6.55511	2	2	4.77759	2	2016
119	Q94AD1	D1861_ARATH Putative DNA-binding protein At1g48610 OS=Arabidopsis thaliana GN=At1g48610 PE=1 SV=1	10	pld1_2 unique	-1	21.6429	0.0119126	0.995679	6.5053	2	2	16.5094	2	2024
120	Q84W89	RH37_ARATH DEAD-box ATP-dependent RNA helicase 37 OS=Arabidopsis thaliana GN=RH37 PE=2 SV=2	10	pld1_2 unique	-1	67.5667	0.00668311	0.998544	6.50222	2	2	4.2654	2	2027
121	Q9XEE2	ANXD2_ARATH Annexin D2 OS=Arabidopsis thaliana GN=ANN2 PE=1 SV=1	10	pld1_2 unique	-1	36.2255	0.00570654	0.998725	6.48828	2	2	10.0946	2	2030
105	Q9C500	WPP2_ARATH WPP domain-containing protein 2 OS=Arabidopsis thaliana GN=WPP2 PE=1 SV=1	2.84	7.1602	0.034	19.1044	0.00428467	0.997064	6.97869	2	2	19.4444	3	1974
33	Q8H112	PGL1A_ARATH PGR5-like protein 1A, chloroplastic OS=Arabidopsis thaliana GN=PGRL1A PE=1 SV=1	2.76	6.77396	0.001	35.68	0.00504639	1	15.2937	4	3	14.8148	9	1479
31	Q9SYW8	LHCA2_ARATH Photosystem I chlorophyll a/b-binding protein 2, chloroplastic OS=Arabidopsis thaliana GN=LHCA2 PE=1 SV=1	2.56	5.89708	0.01	27.7193	0.00729834	1	15.6603	4	3	24.9027	13	1451
97	Q9SW18	CHLM_ARATH Magnesium protoporphyrin IX methyltransferase, chloroplastic OS=Arabidopsis thaliana GN=CHLM PE=1 SV=1	2.48	5.57897	0.023	33.7565	0.00794287	0.998125	7.20196	2	2	9.29487	5	1932
11	Q56WK6	PATL1_ARATH Patellin-1 OS=Arabidopsis thaliana GN=PATL1 PE=1 SV=2	2.15	4.43828	0.045	63.989	0.00466553	1	33.6954	9	9	21.815	24	848
47	Q9C522	ACLB1_ARATH ATP-citrate synthase beta chain protein 1 OS=Arabidopsis thaliana GN=ACLB-1 PE=2 SV=1	2.02	4.05584	0.007	65.754	0.0077085	0.999999	11.1792	3	3	8.05921	6	1634
94	Q9FF55	PDI14_ARATH Protein disulfide isomerase-like 1-4 OS=Arabidopsis thaliana GN=PDIL1-4 PE=1 SV=1	1.94	3.83706	0.006	66.298	0.00432275	0.99867	7.30394	2	2	5.19263	8	1913
64	O22683	CYNS_ARATH Cyanate hydratase OS=Arabidopsis thaliana GN=CYN PE=2 SV=1	1.82	3.53081	0.047	18.5625	0.00533838	0.99988	9.10853	2	2	26.1905	7	1749
110	Q8RWN9	ODP22_ARATH Dihydrolipoyllysine-residue acetyltransferase component 2 of pyruvate dehydrogenase complex, mitochondrial OS=Arabidopsis thaliana GN=At3g13930 PE=1 SV=2	1.73	3.31728	0.026	58.413	0.00753271	0.99969	6.79515	2	2	4.63822	3	1991
17	Q94A28	ACO2M_ARATH Aconitate hydratase 2, mitochondrial OS=Arabidopsis thaliana GN=ACO2 PE=1 SV=3	1.71	3.27161	0.054	108.395	0.00672705	1	28.6512	7	7	11.1558	17	1125
24	Q9M2E2	SDR1_ARATH (+)-neomenthol dehydrogenase OS=Arabidopsis thaliana GN=SDR1 PE=1 SV=1	1.38	2.60268	0.026	32.7648	0.00524951	1	22.764	6	5	30.7432	20	1299
48	Q9LZH9	RL7A2_ARATH 60S ribosomal protein L7a-2 OS=Arabidopsis thaliana GN=RPL7AB PE=2 SV=1	1.32	2.49666	0.041	28.9982	0.0106089	0.999998	11.1593	3	3	14.0625	8	1641
43	P56759	ATPF_ARATH ATP synthase subunit b, chloroplastic OS=Arabidopsis thaliana GN=atpF PE=3 SV=1	1.27	2.41162	0.004	21.0259	0.0086167	1	12.0001	3	3	28.8043	9	1604
22	Q9FVR6	Y1222_ARATH Uncharacterized protein At1g32220, chloroplastic OS=Arabidopsis thaliana GN=At1g32220 PE=2 SV=1	1.14	2.20381	0.05	31.9405	0.00545264	1	24.0996	6	6	35.1351	15	1254
12	Q9SY97	LHCA3_ARATH Photosystem I chlorophyll a/b-binding protein 3-1, chloroplastic OS=Arabidopsis thaliana GN=LHCA3 PE=1 SV=1	1.07	2.09943	0.049	29.145	0.00914404	1	31.185	7	6	41.0256	54	873
23	Q8L940	PDX13_ARATH Pyridoxal 5'-phosphate synthase subunit PDX1.3 OS=Arabidopsis thaliana GN=PDX13 PE=1 SV=2	0.89	1.85318	0.018	33.177	0.00571924	0.999996	23.9433	6	5	29.7735	28	1270
45	P28769	TCPA_ARATH T-complex protein 1 subunit alpha OS=Arabidopsis thaliana GN=CCT1 PE=1 SV=1	0.88	1.84038	0.006	59.1741	0.00588428	0.999997	11.8693	3	3	7.33945	8	1618
19	Q9ZR03	UCRIA_ARATH Cytochrome b6-f complex iron-sulfur subunit, chloroplastic OS=Arabidopsis thaliana GN=petC PE=1 SV=1	0.79	1.72907	0.03	24.3324	0.00867529	1	26.2564	6	6	41.048	48	1163
93	Q9LRX8	R13A2_ARATH 60S ribosomal protein L13a-2 OS=Arabidopsis thaliana GN=RPL13AB PE=2 SV=1	0.79	1.72907	0.038	23.4258	0.0107847	0.9993	7.31604	2	2	12.6214	3	1909
34	Q9S757	CYSC1_ARATH Bifunctional L-3-cyanoalanine synthase/cysteine synthase C1, mitochondrial OS=Arabidopsis thaliana GN=CYSC1 PE=1 SV=1	0.74	1.67018	0.031	39.8836	0.00879248	1	15.2675	4	4	11.413	21	1489
5	O65581	ALFC5_ARATH Fructose-bisphosphate aldolase 5, cytosolic OS=Arabidopsis thaliana GN=FBA5 PE=1 SV=1	0.73	1.65864	0.025	38.2518	0.0055415	1	55.2299	12	12	58.3799	81	560
15	O80448	PDX11_ARATH Pyridoxal 5'-phosphate synthase subunit PDX1.1 OS=Arabidopsis thaliana GN=PDX11 PE=1 SV=1	0.73	1.65864	0.038	32.8229	0.00565576	1	29.4352	7	6	25.2427	43	1063
9	Q9MA79	F16P2_ARATH Fructose-1,6-bisphosphatase, cytosolic OS=Arabidopsis thaliana GN=CYFBP PE=1 SV=1	0.72	1.64718	0.039	37.2457	0.00516064	1	36.1334	8	8	41.349	46	756
55	Q9LYR5	FKB19_ARATH Peptidyl-prolyl cis-trans isomerase FKBP19, chloroplastic OS=Arabidopsis thaliana GN=FKBP19 PE=1 SV=1	0.72	1.64718	0	27.7429	0.00776709	0.999996	10.4604	3	3	21.4844	4	1697
79	Q8L7C9	GSTUK_ARATH Glutathione S-transferase U20 OS=Arabidopsis thaliana GN=GSTU20 PE=1 SV=1	0.69	1.61328	0.038	24.9726	0.00551611	0.999986	7.89352	2	2	11.0599	13	1826
26	Q96327	EBP1_ARATH ERBB-3 BINDING PROTEIN 1 OS=Arabidopsis thaliana GN=EBP1 PE=1 SV=1	0.64	1.55833	0.044	42.9343	0.0063667	1	19.3694	5	4	15.051	12	1356
2	O65719	HSP7C_ARATH Heat shock 70 kDa protein 3 OS=Arabidopsis thaliana GN=HSP70-3 PE=1 SV=1	-0.47	0.721965	0.052	71.0852	0.00481787	1	106.705	26	24	55.1618	146	213
56	Q9C5Z2	EIF3H_ARATH Eukaryotic translation initiation factor 3 subunit H OS=Arabidopsis thaliana GN=TIF3H1 PE=1 SV=2	-0.53	0.692555	0.004	38.33	0.00467822	0.999952	10.3942	3	3	12.7596	3	1702
7	Q9SGC1	PGMC2_ARATH Probable phosphoglucomutase, cytoplasmic 2 OS=Arabidopsis thaliana GN=At1g70730 PE=1 SV=1	-0.56	0.678302	0.023	63.4243	0.00547803	1	42.0807	11	10	33.6752	30	697
29	Q9LR64	PB27A_ARATH Photosystem II repair protein PSB27-H1, chloroplastic OS=Arabidopsis thaliana GN=PSB27-1 PE=1 SV=1	-0.58	0.668964	0.045	18.8051	0.0103013	1	16.532	4	4	28.1609	34	1394
87	P49243	FABH_ARATH 3-oxoacyl-[acyl-carrier-protein] synthase III, chloroplastic OS=Arabidopsis thaliana GN=At1g62640 PE=2 SV=2	-0.59	0.664343	0	42.8016	0.00706396	0.999842	7.50385	2	2	7.92079	5	1876
1	P22953	MD37E_ARATH Probable mediator of RNA polymerase II transcription subunit 37e OS=Arabidopsis thaliana GN=MED37E PE=1 SV=3	-0.63	0.646176	0.003	71.2951	0.00486865	1	127.79	29	27	57.9109	209	3
4	P22954	MD37D_ARATH Probable mediator of RNA polymerase II transcription subunit 37c OS=Arabidopsis thaliana GN=MED37D PE=1 SV=2	-0.63	0.646176	0.02	71.3242	0.00488135	0.99587	61.1532	14	13	30.4747	95	464
3	Q9LHA8	MD37C_ARATH Probable mediator of RNA polymerase II transcription subunit 37c OS=Arabidopsis thaliana GN=MED37C PE=1 SV=1	-0.64	0.641713	0.027	71.039	0.00498291	1	75.0019	18	17	35.8462	103	360
39	Q94JX9	NACA2_ARATH Nascent polypeptide-associated complex subunit alpha-like protein 2 OS=Arabidopsis thaliana GN=At3g49470 PE=2 SV=2	-0.64	0.641713	0.041	23.6797	0.0042085	0.999997	13.9903	3	3	19.8157	14	1569
10	Q56WD9	THIK2_ARATH 3-ketoacyl-CoA thiolase 2, peroxisomal OS=Arabidopsis thaliana GN=PED1 PE=1 SV=2	-0.66	0.632878	0.055	48.53	0.00833838	1	35.5753	8	7	30.0866	44	803
14	P39207	NDK1_ARATH Nucleoside diphosphate kinase 1 OS=Arabidopsis thaliana GN=NDK1 PE=1 SV=1	-0.67	0.628507	0.054	16.4715	0.0063667	1	29.5545	7	6	55.0336	37	1025
37	Q9ZSK4	ADF3_ARATH Actin-depolymerizing factor 3 OS=Arabidopsis thaliana GN=ADF3 PE=1 SV=1	-0.68	0.624165	0.05	15.894	0.00592236	1	14.5428	3	3	43.1655	15	1546
13	Q9XFT3-2	PSBQ1_ARATH Isoform 2 of Oxygen-evolving enhancer protein 3-1, chloroplastic OS=Arabidopsis thaliana GN=PSBQ1	-0.7	0.615572	0.017	23.7627	0.0100522	1	30.882	7	7	43.4978	96	928
21	Q96255	SERB1_ARATH Phosphoserine aminotransferase 1, chloroplastic OS=Arabidopsis thaliana GN=PSAT1 PE=1 SV=1	-0.7	0.615572	0.008	47.3111	0.00803076	1	24.499	6	6	21.3953	27	1226
30	Q8GYL5	RS253_ARATH 40S ribosomal protein S25-3 OS=Arabidopsis thaliana GN=RPS25D PE=3 SV=2	-0.7	0.615572	0.026	11.9926	0.0111802	0.995871	15.9074	4	3	26.8519	21	1429
75	O22870	FK163_ARATH Peptidyl-prolyl cis-trans isomerase FKBP16-3, chloroplastic OS=Arabidopsis thaliana GN=FKBP16-3 PE=1 SV=2	-0.73	0.602904	0.019	23.5312	0.00842627	0.999749	8.10499	2	2	11.2108	6	1803
60	Q1JPL7	PME18_ARATH Pectinesterase/pectinesterase inhibitor 18 OS=Arabidopsis thaliana GN=PME18 PE=1 SV=3	-0.75	0.594604	0.045	61.6305	0.00898291	0.99948	10.0696	3	3	9.15619	3	1730
91	P56805	RR15_ARATH 30S ribosomal protein S15, chloroplastic OS=Arabidopsis thaliana GN=rps15 PE=3 SV=1	-0.76	0.590496	0.038	10.694	0.0112681	0.999895	7.40113	2	2	30.6818	8	1895
41	Q9LT69	SERA3_ARATH D-3-phosphoglycerate dehydrogenase 3, chloroplastic OS=Arabidopsis thaliana GN=PGDH3 PE=1 SV=1	-0.79	0.578344	0.014	62.0652	0.00833838	0.999602	12.7387	4	4	10.5442	5	1589
46	Q9ZW84	LEUD1_ARATH 3-isopropylmalate dehydratase small subunit 1 OS=Arabidopsis thaliana GN=IPMI2 PE=1 SV=1	-0.79	0.578344	0.002	27.0084	0.00570654	0.999997	11.4349	3	3	19.9219	6	1627
84	Q9FT52	ATP5H_ARATH ATP synthase subunit d, mitochondrial OS=Arabidopsis thaliana GN=At3g52300 PE=1 SV=3	-0.79	0.578344	0.02	19.5559	0.00494482	0.999907	7.65673	2	2	15.4762	10	1855
58	P27323	HS901_ARATH Heat shock protein 90-1 OS=Arabidopsis thaliana GN=HSP90-1 PE=1 SV=3	-0.81	0.570382	0.002	80.5669	0.00481787	0.999991	10.2017	3	3	6.42857	13	1711
36	Q9LVT8	RGGC_ARATH RGG repeats nuclear RNA binding protein C OS=Arabidopsis thaliana GN=RGGC PE=1 SV=1	-0.84	0.558644	0.008	37.9588	0.00927588	1	14.8024	4	4	19.0476	19	1526
8	Q9LYG3	MAOP2_ARATH NADP-dependent malic enzyme 2 OS=Arabidopsis thaliana GN=NADP-ME2 PE=1 SV=1	-0.86	0.550953	0.008	64.3542	0.00598584	1	41.2805	11	11	33.5034	27	728
25	Q42406	CP18D_ARATH Peptidyl-prolyl cis-trans isomerase CYP18-4 OS=Arabidopsis thaliana GN=CYP18-4 PE=1 SV=1	-0.92	0.528509	0.03	18.3482	0.00896826	1	20.5621	4	3	34.3023	35	1320
6	P16127	CHLI1_ARATH Magnesium-chelatase subunit ChlI-1, chloroplastic OS=Arabidopsis thaliana GN=CHLI1 PE=1 SV=1	-0.94	0.521233	0.021	46.2232	0.00604932	1	44.5122	11	11	39.6226	54	642
102	Q9LW85	MFP1_ARATH MAR-binding filament-like protein 1 OS=Arabidopsis thaliana GN=MFP1 PE=2 SV=2	-0.96	0.514057	0.025	81.9049	0.00524951	0.998147	7.01544	2	2	4.13223	3	1964
100	Q9ZRW8	GSTUJ_ARATH Glutathione S-transferase U19 OS=Arabidopsis thaliana GN=GSTU19 PE=1 SV=1	-0.97	0.510506	0.053	25.6163	0.00570654	0.999714	7.081	2	2	12.7854	13	1947
51	Q94K05	TCPQ_ARATH T-complex protein 1 subunit theta OS=Arabidopsis thaliana GN=CCT8 PE=1 SV=1	-1	0.5	0.046	58.8842	0.00510986	0.999998	10.7636	3	3	8.56102	7	1663
52	Q43387	PER71_ARATH Peroxidase 71 OS=Arabidopsis thaliana GN=PER71 PE=1 SV=1	-1	0.5	0.033	34.8496	0.00811865	0.999986	10.7585	3	3	17.0732	8	1671
32	Q9T029	RS254_ARATH 40S ribosomal protein S25-4 OS=Arabidopsis thaliana GN=RPS25E PE=3 SV=1	-1.04	0.486327	0.036	12.0276	0.0111802	0.998515	15.3279	4	3	26.8519	13	1465
78	O22793	MORF2_ARATH Multiple organellar RNA editing factor 2, chloroplastic OS=Arabidopsis thaliana GN=MORF2 PE=1 SV=1	-1.12	0.460094	0.007	24.6812	0.00823584	0.99991	7.90009	2	2	16.4384	8	1817
74	Q8VYV7	DHQS_ARATH 3-dehydroquinate synthase, chloroplastic OS=Arabidopsis thaliana GN=DHQS PE=1 SV=1	-1.29	0.408951	0.036	48.0158	0.0072251	0.999966	8.14649	2	2	8.82353	5	1797
28	Q96529	PURA_ARATH Adenylosuccinate synthetase, chloroplastic OS=Arabidopsis thaliana GN=PURA PE=1 SV=1	-1.35	0.392292	0.023	52.9133	0.00672705	1	16.7516	4	4	15.102	14	1379
18	Q42592	APXS_ARATH L-ascorbate peroxidase S, chloroplastic/mitochondrial OS=Arabidopsis thaliana GN=APXS PE=1 SV=2	-1.39	0.381565	0.027	40.3645	0.00857275	1	27.2075	7	7	33.3333	19	1143
112	O04153	CALR3_ARATH Calreticulin-3 OS=Arabidopsis thaliana GN=CRT3 PE=1 SV=2	-1.52	0.348686	0.053	49.7948	0.00574463	0.988122	6.72698	2	2	7.54717	3	1998
38	O81645	VILI3_ARATH Villin-3 OS=Arabidopsis thaliana GN=VLN3 PE=1 SV=2	-1.55	0.34151	0	106.265	0.00551611	1	14.2904	4	4	6.94301	6	1562
16	Q9LIB2	PHS1_ARATH Alpha-glucan phosphorylase 1 OS=Arabidopsis thaliana GN=PHS1 PE=1 SV=1	-1.58	0.334482	0.011	108.499	0.00522412	1	29.0883	8	8	15.4886	17	1107
95	Q9FK81	Y5258_ARATH Stress-response A/B barrel domain-containing protein At5g22580 OS=Arabidopsis thaliana GN=At5g22580 PE=1 SV=1	-1.66	0.316439	0.001	12.3233	0.00535107	0.999693	7.27738	2	2	22.5225	5	1922
35	O22263	PDI21_ARATH Protein disulfide-isomerase like 2-1 OS=Arabidopsis thaliana GN=PDIL2-1 PE=2 SV=1	-1.67	0.314253	0.051	39.4544	0.00571924	0.999999	14.8907	4	4	13.5734	14	1511
86	Q9LIR4	ILVD_ARATH Dihydroxy-acid dehydratase, chloroplastic OS=Arabidopsis thaliana GN=DHAD PE=1 SV=1	-1.68	0.312083	0.04	64.8537	0.00580811	0.999862	7.58961	2	2	6.08553	5	1870
62	Q8LDV3	Y4320_ARATH Uncharacterized protein At4g13200, chloroplastic OS=Arabidopsis thaliana GN=At4g13200 PE=2 SV=2	-1.74	0.29937	0.021	20.3992	0.00510986	0.999991	9.90837	3	3	22.7027	5	1739
114	Q9C5D0	CBSX2_ARATH CBS domain-containing protein CBSX2, chloroplastic OS=Arabidopsis thaliana GN=CBSX2 PE=1 SV=1	-1.76	0.295248	0.018	25.9216	0.00908545	0.99895	6.67177	2	2	12.605	4	2005
20	Q9FMD5	TIC40_ARATH Protein TIC 40, chloroplastic OS=Arabidopsis thaliana GN=TIC40 PE=1 SV=1	-1.85	0.277392	0.025	48.8539	0.00522412	1	25.8117	6	6	24.1611	13	1212
89	Q9LR44	U75B1_ARATH UDP-glycosyltransferase 75B1 OS=Arabidopsis thaliana GN=UGT75B1 PE=1 SV=1	-1.87	0.273573	0.026	52.7619	0.00542725	0.998115	7.4402	2	2	6.18337	4	1886
70	Q9LXX5	PPD6_ARATH PsbP domain-containing protein 6, chloroplastic OS=Arabidopsis thaliana GN=PPD6 PE=1 SV=1	-1.9	0.267943	0.029	28.5942	0.00965674	0.99989	8.2736	2	2	14.1221	9	1776
54	P49200	RS201_ARATH 40S ribosomal protein S20-1 OS=Arabidopsis thaliana GN=RPS20A PE=2 SV=2	-2.09	0.234881	0.015	13.8515	0.0101987	0.99999	10.5631	3	3	29.0323	11	1685
27	Q9C514	RS71_ARATH 40S ribosomal protein S7-1 OS=Arabidopsis thaliana GN=RPS7A PE=2 SV=1	-2.33	0.198884	0.033	21.891	0.010228	1	18.1505	4	4	30.8901	9	1369
49	Q9S7D8	APS4_ARATH ATP sulfurylase 4, chloroplastic OS=Arabidopsis thaliana GN=APS4 PE=2 SV=1	-3.14	0.11344	0.023	52.0749	0.00926123	0.999998	10.8886	3	3	8.742	8	1650
77	Q9SA18	AKH1_ARATH Bifunctional aspartokinase/homoserine dehydrogenase 1, chloroplastic OS=Arabidopsis thaliana GN=AKHSDH1 PE=1 SV=1	-3.14	0.11344	0.013	99.3235	0.00632861	0.995508	7.94569	2	2	4.06147	3	1813
42	Q38882	PLDA1_ARATH Phospholipase D alpha 1 OS=Arabidopsis thaliana GN=PLDALPHA1 PE=1 SV=2	-10	col_0 unique	-1	91.7721	0.00546533	1	12.0594	3	3	8.14815	8	1595
61	Q9T0I8	MTN1_ARATH 5'-methylthioadenosine/S-adenosylhomocysteine nucleosidase 1 OS=Arabidopsis thaliana GN=MTN1 PE=1 SV=1	-10	col_0 unique	-1	28.4149	0.00450049	0.999997	9.94293	2	2	17.9775	4	1734
66	Q8L770	CLPR3_ARATH ATP-dependent Clp protease proteolytic subunit-related protein 3, chloroplastic OS=Arabidopsis thaliana GN=CLPR3 PE=1 SV=1	-10	col_0 unique	-1	36.2657	0.00873389	0.999784	8.60558	2	2	12.1212	2	1761
68	Q9LNB6	HSOP1_ARATH Hsp70-Hsp90 organizing protein 1 OS=Arabidopsis thaliana GN=HOP1 PE=2 SV=1	-10	col_0 unique	-1	64.5263	0.00589697	0.999996	8.54177	2	2	8.04196	3	1767
72	P40941	ADT2_ARATH ADP,ATP carrier protein 2, mitochondrial OS=Arabidopsis thaliana GN=AAC2 PE=1 SV=2	-10	col_0 unique	-1	41.7016	0.0101255	0.999923	8.21448	2	2	8.31169	2	1790
73	O81852	AKH2_ARATH Bifunctional aspartokinase/homoserine dehydrogenase 2, chloroplastic OS=Arabidopsis thaliana GN=AKHSDH2 PE=1 SV=1	-10	col_0 unique	-1	100.169	0.00721045	0.988669	8.17181	2	2	4.25764	3	1793
76	Q8L785	SYGM2_ARATH Glycine--tRNA ligase, chloroplastic/mitochondrial 2 OS=Arabidopsis thaliana GN=EDD1 PE=1 SV=1	-10	col_0 unique	-1	119.68	0.00563037	0.999955	7.9919	2	2	3.74883	2	1810
82	Q9SYM5	RHM1_ARATH Trifunctional UDP-glucose 4,6-dehydratase/UDP-4-keto-6-deoxy-D-glucose 3,5-epimerase/UDP-4-keto-L-rhamnose-reductase RHM1 OS=Arabidopsis thaliana GN=RHM1 PE=1 SV=1	-10	col_0 unique	-1	75.306	0.00688818	0.581024	7.71423	2	1	3.43797	3	1846
83	Q93W34	RP45C_ARATH Polyadenylate-binding protein RBP45C OS=Arabidopsis thaliana GN=RBP45C PE=2 SV=1	-10	col_0 unique	-1	44.9262	0.0055542	0.999778	7.67039	2	2	9.39759	4	1850
90	Q93Z16	RPN2_ARATH Dolichyl-diphosphooligosaccharide--protein glycosyltransferase subunit 2 OS=Arabidopsis thaliana GN=RPN2 PE=1 SV=1	-10	col_0 unique	-1	74.6038	0.00732764	0.999791	7.42916	2	2	4.63097	3	1891
92	Q9MAH3	DJ1B_ARATH Protein DJ-1 homolog B OS=Arabidopsis thaliana GN=DJ1B PE=1 SV=1	-10	col_0 unique	-1	46.9425	0.00776709	0.999977	7.37531	2	2	9.58904	4	1904
98	Q9T0A4	NDHS_ARATH NAD(P)H-quinone oxidoreductase subunit S, chloroplastic OS=Arabidopsis thaliana GN=ndhS PE=1 SV=1	-10	col_0 unique	-1	27.6911	0.00841162	0.99915	7.17323	2	2	11.6	3	1938
101	Q9SIU0	MAO1_ARATH NAD-dependent malic enzyme 1, mitochondrial OS=Arabidopsis thaliana GN=NAD-ME1 PE=1 SV=1	-10	col_0 unique	-1	69.5931	0.00517334	0.997046	7.03661	2	2	6.26003	2	1961
116	Q8LPS6	PPR3_ARATH Pentatricopeptide repeat-containing protein At1g02150 OS=Arabidopsis thaliana GN=At1g02150 PE=2 SV=2	-10	col_0 unique	-1	59.8266	0.00808936	0.998505	6.56814	2	2	6.10687	2	2013
118	Q8L5Z7	SNX2A_ARATH Sorting nexin 2A OS=Arabidopsis thaliana GN=SNX2A PE=1 SV=1	-10	col_0 unique	-1	65.4687	0.00503369	0.998629	6.54716	2	2	4.4293	4	2019
